# Supplementary material for: The Photoperiod-Driven Cyclical Secretion of Pineal Melatonin Regulates Seasonal Reproduction in Geese (Anser cygnoides)
Source: MDPI journal article supplement (doi:10.3390/ijms241511998), 2023-07-26
Supplement: s1 [file s1]

**Table S1.** Composition and nutrient content of experimental diet (air-dry basis).

| Item                     | Content | Item                        | Content |
|--------------------------|---------|-----------------------------|---------|
| Metabolic energy (MJ/kg) | 11.29   | Zinc (mg/kg)                | 33      |
| Crude protein (%)        | 16      | Calcium (g/kg)              | 45      |
| Corn powder (g/kg)       | 403     | Manganese (mg/kg)           | 55      |
| Crushed wheat (g/kg)     | 250     | Available phosphorus (g/kg) | 35      |
| Bean cake powder (g/kg)  | 135     | Vitamin A (IU/kg)           | 4409    |
| Green hay powder (g/kg)  | 127     | Vitamin D3 (IU/kg)          | 661     |
| Salt (g/kg)              | 5       |                             |         |

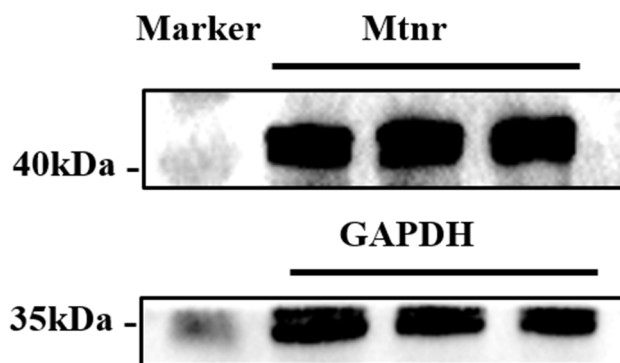

**Figure S1.** Verification of antibody specificity.
